# Supplementary material for: Some Gram-negative Lipoproteins Keep Their Surface Topology When Transplanted from One Species to Another and Deliver Foreign Polypeptides to the Bacterial Surface
Source: PubMed Central journal article supplement (PMC5500766; doi:10.1074/mcp.m116.065094), 2017-05-08

**Figure S1**

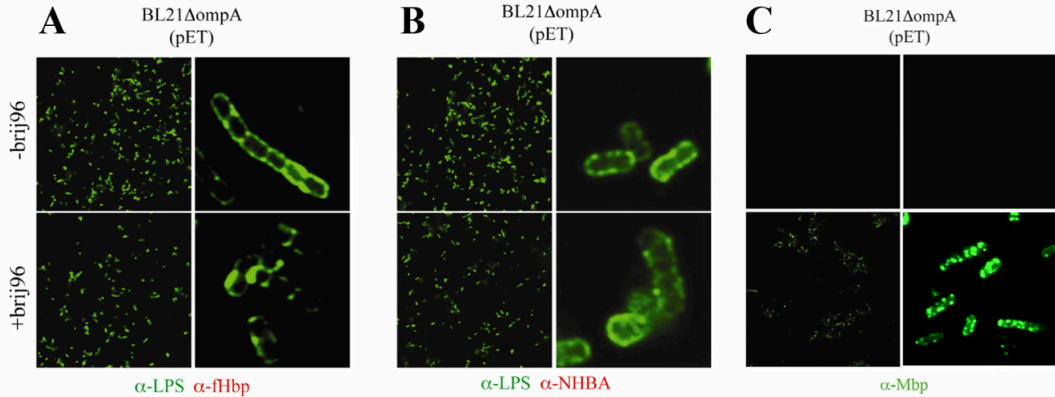

# Figure S2

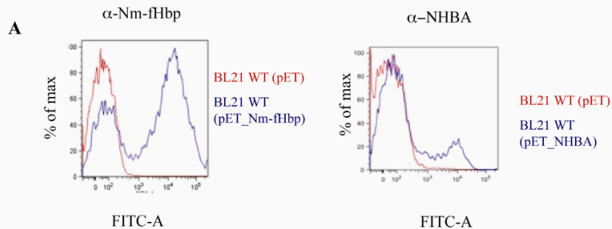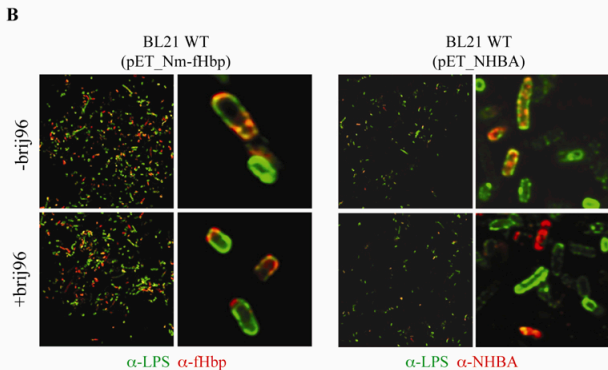

Figure S3

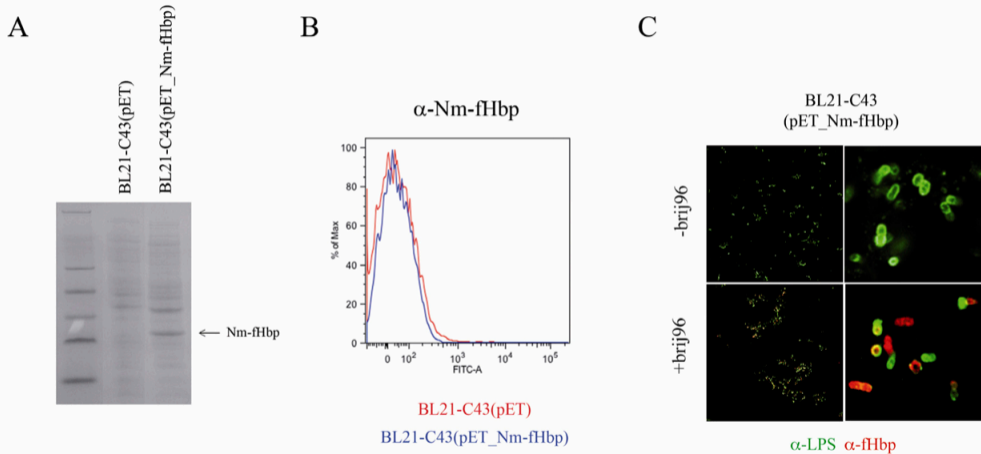

# Figure S4

**A**

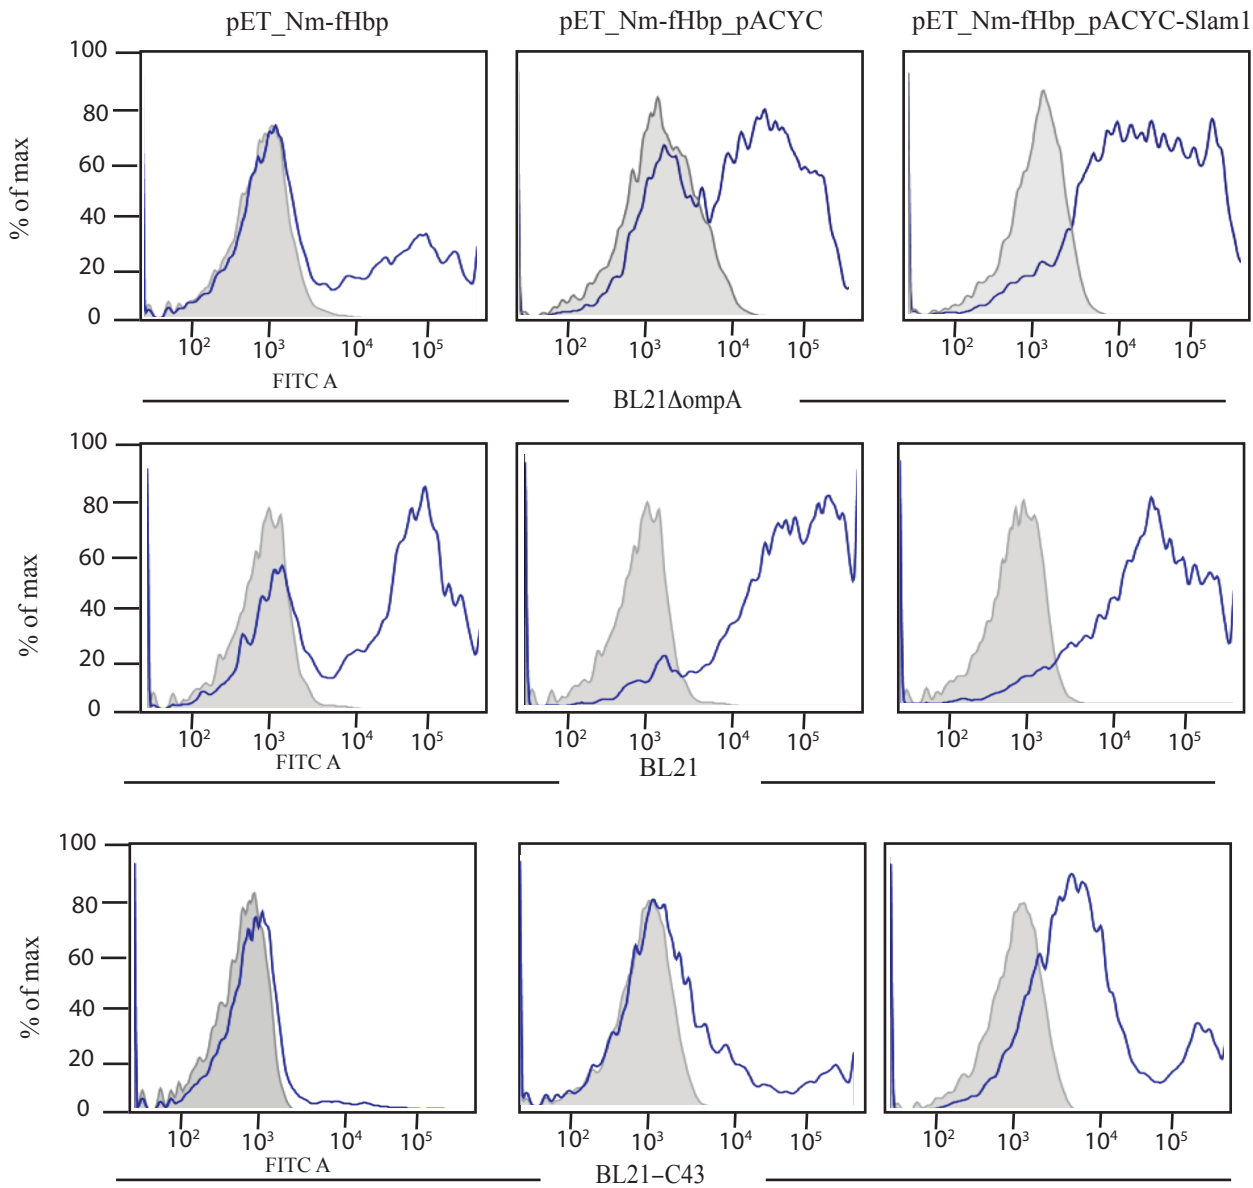

**B**

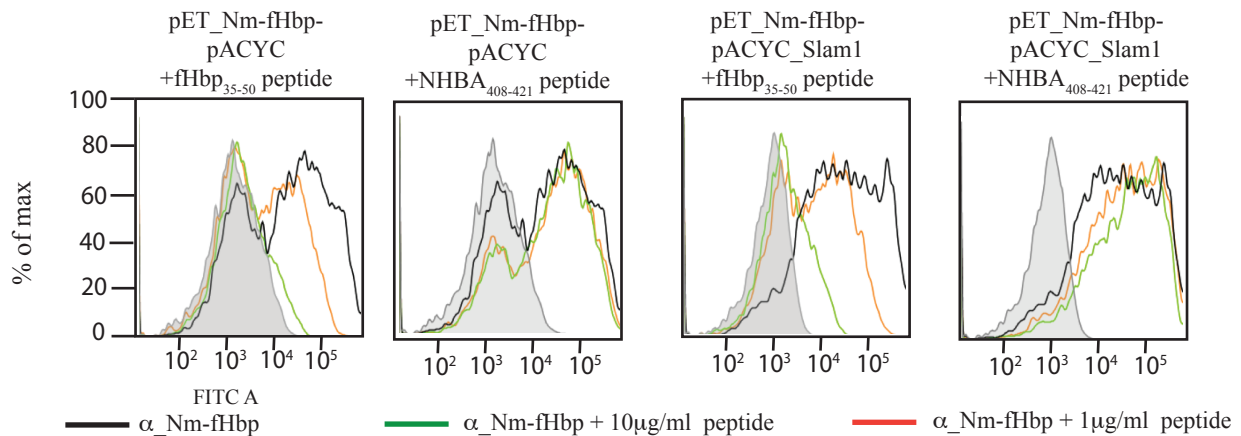

# Figure S5

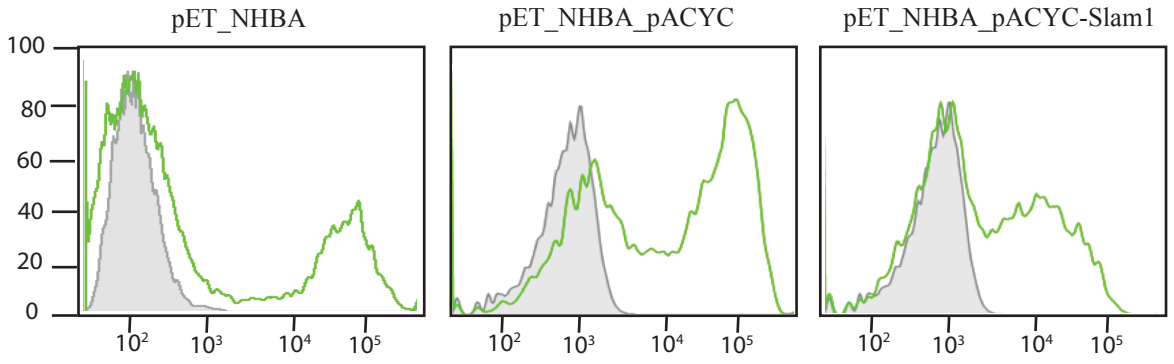

Supplement: 10.1074_M116.065094_mcp.M116.065094-1.pdf [file 10.1074_M116.065094_mcp.M116.065094-1.pdf]
