# Supplementary material for: Some Gram-negative Lipoproteins Keep Their Surface Topology When Transplanted from One Species to Another and Deliver Foreign Polypeptides to the Bacterial Surface
Source: PubMed Central journal article supplement (PMC5500766; doi:10.1074/mcp.m116.065094), 2017-05-08
Supplement: 10.1074_M116.065094_mcp.M116.065094-2.pdf [file 10.1074_M116.065094_mcp.M116.065094-2.pdf]

### Figure S1

Control of anti Nm-fHbp, anti-NHBA, anti-LPS and anti-Mbp antibody specificity on *E.coli* BL21 $\Delta ompA$  recipient strain. Bacterial cells from BL21 $\Delta ompA$ (pET) strain were fixed with 2% formaldehyde solution and incubated with specific antibodies in the presence (lower panels) or absence (upper panels) of membrane permeabilization by 0,1% Brij96. Anti Nm-fHbp or anti-NHBA antibody binding on the recipient strain was followed by incubating cells with alexa fluor 594-labelled anti-rabbit antibodies (red), while anti-LPS and anti-Mbp antibody binding was followed using alexa fluor 488-labelled anti-mouse antibody (green). In A, B, C, each right panel represents a magnification of the corresponding left panel. **A)** Cells were incubated with rabbit anti-Nm-fHbp and mouse anti-LPS; **B)** Cells were incubated with rabbit anti-NHBA and mouse anti-LPS antibodies; **C)** Cells were incubated with rabbit anti-Mbp and mouse anti-Mbp antibody.

### Figure S2

Assessment of Nm-fHbp and NHBA localization by FACS analysis and confocal microscopy in BL21 WT strain. **A)** After IPTG induction bacterial cells from BL21(pET) (red histograms), BL21(pET\_Nm-fHbp) and BL21(pET\_NHBA) (blue histograms) strains were incubated first with anti-Nm-fHbp and anti-NHBA specific antibodies, respectively, and subsequently with FITC-labelled anti-rabbit secondary antibodies. Fluorescence was measured by Fluorescence-activated Cell Sorting (FACS). **B)** Bacterial cells from BL21 (pET\_Nm-fHbp) (left) and BL21(pET\_NHBA) (right) strains were fixed with 2% formaldehyde solution and incubated with anti-Nm-fHbp and anti-NHBA antibodies and with a mouse

monoclonal antibody specific for the core region of LPS. To analyze an intracellular staining samples were first treated with 0,1% Brj96 5 min at room temperature RT (+brij96). The binding of anti-Nm-fHbp and anti-NHBA antibodies was visualized with alexa fluor 594-labelled anti-rabbit antibodies (red), while anti-LPS antibody binding was followed using alexa fluor 488-labelled anti-mouse antibody (green).

### **Figure S3**

Assessment of localization of Nm-fHbp expressed in *E. coli* BL21-C43 strain by FACS analysis and confocal microscopy. **A)** SDS-PAGE analysis of total cell extracts from BL21-C43 and BL21-C43 (pET\_Nm-fHbp) strains. **B)** BL21-C43 (pET\_Nm-fHbp) (blue histogram) and BL21-C43 (pET) (red histogram) strains were incubated first with rabbit anti-Nm-fHbp specific antibody, and subsequently with FITC-labelled anti-rabbit secondary antibodies. Fluorescence was measured by Fluorescence-activated Cell Sorting (FACS). **C)** Bacterial cells from BL21-C43 (pET\_Nm-fHbp) strain were fixed with 2% formaldehyde solution and incubated with rabbit anti-Nm-fHbp antibody in the presence of a mouse monoclonal antibody specific for the core region of LPS in the presence (lower panels) or absence (upper panels) of permeabilization treatment with 0,1% Brij96. The binding of anti-Nm-fHbp antibody was visualized with alexa fluor 594-labelled anti-rabbit antibodies (red), while anti-LPS antibody binding was followed using alexa fluor 488-labelled anti-mouse antibody (green). Each right panel represents a magnification of the corresponding left panel.

### **Figure S4**

Effect of Slam1 on surface localization of Nm-fHbp. **A)** BL21 $\Delta ompA$ , BL21 WT and BL21-C43 strains transformed with pET\_Nm-fHbp, pET\_Nm-fHbp+pACYC and pET\_Nm-fHbp+pACYC\_slam1 plasmids were grown in LB at 37°C. At OD<sub>600</sub> = 0.5, 1 mM IPTG was added and after 2 hours bacterial cells were collected by centrifugation and incubated with anti-Nm-fHbp specific antibodies and subsequently with FITC-labelled anti-rabbit secondary antibodies. Fluorescence was measured by Fluorescence-activated Cell Sorting (FACS). **B)** BL21 $\Delta ompA$ (pET\_Nm-fHbp)(pACYC) and BL21 $\Delta ompA$ (pET\_Nm-fHbp)(pACYC\_slam1) strains were grown as described above and the binding of anti-Nm-fHbp antibodies was followed by FACS in the presence or absence of different concentration of either fHbp-derived peptide<sub>35-50</sub> or NHBA-derived peptide<sub>408-421</sub>

### **Figure S5**

Effect of Slam1 on surface localization of NHBA in BL21 $\Delta ompA$ . Bacterial cells co-transformed with either pET\_NHBA + pACYC or pET\_NHBA + pACYC\_slam1 plasmids were grown in LB at 37°C. At OD<sub>600</sub> = 0.5, 1 mM IPTG was added and after 2 hours bacterial cells were collected by centrifugation and incubated with anti-NHBA specific rabbit antibodies and subsequently with FITC-labelled anti-rabbit secondary antibodies. Fluorescence was measured by Fluorescence-activated Cell Sorting (FACS).
