# Supplementary material for: Some Gram-negative Lipoproteins Keep Their Surface Topology When Transplanted from One Species to Another and Deliver Foreign Polypeptides to the Bacterial Surface
Source: PubMed Central journal article supplement (PMC5500766; doi:10.1074/mcp.m116.065094), 2017-05-08
Supplement: 10.1074_M116.065094_mcp.M116.065094-3.pdf [file 10.1074_M116.065094_mcp.M116.065094-3.pdf]

**Table S1: Proteins separated by 2D gels analysis and identified by MALDI-TOF analysis**

| Spot | Protein description                                          | AC <sup>a</sup> | Mascot search results |                |                   | Localization    |
|------|--------------------------------------------------------------|-----------------|-----------------------|----------------|-------------------|-----------------|
|      |                                                              |                 | Score                 | N. of peptides | Seq. coverage (%) |                 |
| 2    | Putative lipoprotein AcfD homolog                            | ACFD_ECOLI      | 76                    | 9/13           | 6                 | Inner membrane  |
| 10   | Cellulose synthase operon protein C                          | BCSC_ECOLI      | 112                   | 10/11          | 8                 | Outer membrane  |
| 15   | Protease 3                                                   | PTRA_ECO57      | 112                   | 11/15          | 14                | Periplasm       |
| 25   | LPS-assembly protein LptD                                    | LPTD_ECO57      | 113                   | 11/18          | 17                | Outer membrane  |
| 26   | LPS-assembly protein LptD                                    | LPTD_ECO57      | 216                   | 24/49          | 42                | Outer membrane  |
|      | Outer membrane protein assembly factor BamA                  | BAMA_ECO24      | 112                   | 16/49          | 27                | Outer membrane  |
| 27   | Outer membrane protein assembly factor BamA                  | BAMA_ECO24      | 371                   | 34/44          | 53                | Outer membrane  |
| 28   | Maltoporin                                                   | LAMB_ECOBW      | 162                   | 16/32          | 52                | Outer membrane  |
| 32   | Ferrienterobactin receptor                                   | FEPA_ECOLI      | 108                   | 8/9            | 15                | Outer membrane  |
| 33   | Ferrienterobactin receptor                                   | FEPA_ECOLI      | 247                   | 24/35          | 40                | Outer membrane  |
| 34   | Ferrienterobactin receptor                                   | FEPA_ECOLI      | 278                   | 30/52          | 52                | Outer membrane  |
| 37   | Ferrichrome-iron receptor                                    | FHUA_ECOLI      | 116                   | 8/8            | 13                | Outer membrane  |
| 38   | Ferrichrome-iron receptor                                    | FHUA_ECOLI      | 184                   | 20/34          | 33                | Outer membrane  |
| 39   | Probable TonB-dependent receptor YncD                        | YLCD_ECOLI      | 162                   | 28/96          | 52                | Outer membrane, |
|      | Ferrichrome-iron receptor                                    | FHUA_ECOLI      | 106                   | 23/96          | 35                | Outer membrane, |
|      | Ferrienterobactin receptor                                   | FEPA_ECOLI      | 68                    | 15/96          | 32                | Outer membrane  |
| 40   | Ferrichrome-iron receptor                                    | FHUA_ECOLI      | 136                   | 10/11          | 18                | Outer membrane  |
| 42   | Fe(3+) dicitrate transport protein FecA                      | FECA_ECOLI      | 148                   | 11/12          | 18                | Outer membrane  |
| 47   | Periplasmic beta-glucosidase                                 | BGLX_ECOLI      | 100                   | 8/10           | 13                | Periplasm       |
| 48   | Periplasmic beta-glucosidase                                 | BGLX_ECOLI      | 198                   | 18/26          | 30                | Periplasm       |
| 53   | Tail-specific protease                                       | PRC_ECOLI       | 154                   | 14/19          | 24                | Inner membrane  |
| 55   | FhuE receptor                                                | FHUE_ECOLI      | 104                   | 7/7            | 13                | Outer membrane  |
| 57   | Penicillin-binding protein activator LpoA                    | LPOA_ECOLI      | 127                   | 9/10           | 19                | Outer membrane  |
| 58   | Penicillin-binding protein activator LpoA                    | LPOA_ECOLI      | 225                   | 18/24          | 34                | Outer membrane  |
| 59   | Penicillin-binding protein activator LpoA                    | LPOA_ECOLI      | 330                   | 31/46          | 52                | Outer membrane  |
| 60   | Penicillin-binding protein activator LpoA                    | LPOA_ECOLI      | 147                   | 12/16          | 22                | Outer membrane  |
| 64   | Penicillin-binding protein activator LpoA                    | LPOA_ECOLI      | 121                   | 8/8            | 16                | Outer membrane  |
| 65   | Colicin I receptor                                           | CIRA_ECOLI      | 123                   | 8/8            | 18                | Outer membrane  |
| 68   | Outer membrane protein assembly factor BamA                  | BAMA_ECO24      | 104                   | 9/12           | 12                | Outer membrane  |
| 78   | Alpha-amylase                                                | AMY1_ECOLI      | 140                   | 11/14          | 15                | Outer membrane  |
| 79   | 2',3'-cyclic-nucleotide 2'-phosphodiesterase/3'-nucleotidase | CPDB_ECOLI      | 127                   | 9/10           | 16                | Periplasm       |
| 80   | 2',3'-cyclic-nucleotide 2'-phosphodiesterase/3'-nucleotidase | CPDB_ECOLI      | 171                   | 13/16          | 24                | Periplasm       |
| 88   | Soluble lytic mureintransglycosylase                         | SLT_ECO57       | 208                   | 17/19          | 24                | Periplasm       |
| 100  | Protein UshA                                                 | USHA_ECOLI      | 138                   | 9/9            | 17                | Periplasm       |
| 102  | Putative periplasmictrehalase                                | TREA_ECO57      | 125                   | 8/8            | 16                | Periplasm       |
| 103  | Uncharacterized sulfataseYdeN                                | YDEN_ECOLI      | 79                    | 6/9            | 18                | Outer membrane  |
| 105  | Uncharacterized sulfataseYdeN                                | YDEN_ECOLI      | 146                   | 9/9            | 23                | Outer membrane  |
| 109  | Glucans biosynthesis protein D                               | OPGD_ECO24      | 215                   | 15/17          | 26                | Periplasm       |
| 110  | Periplasmicoligopeptide-binding protein                      | OPPA_ECOLI      | 135                   | 10/13          | 20                | Periplasm       |
| 111  | Periplasmicoligopeptide-binding protein                      | OPPA_ECOLI      | 264                   | 22/35          | 42                | Periplasm       |
| 115  | Polysialic acid transport protein KpsD                       | OPGG_ECO24      | 110                   | 7/7            | 20                | Periplasm       |
| 114  | Glucans biosynthesis protein G                               | KPSD1_ECOLX     | 139                   | 11/16          | 24                | Periplasm       |
| 116  | Glucans biosynthesis protein G                               | OPGG_ECO24      | 232                   | 19/24          | 41                | Periplasm       |

|     |                                                            |             |     |       |    |                   |
|-----|------------------------------------------------------------|-------------|-----|-------|----|-------------------|
| 120 | Glycerophosphoryldiesterphosphodiesterase                  | GLPQ_ECOLI  | 103 | 8/13  | 27 | Periplasm         |
| 137 | Periplasmic serine endoproteaseDegP                        | DEGP_ECO57  | 134 | 8/8   | 25 | Periplasm         |
| 138 | Periplasmic serine endoproteaseDegP                        | DEGP_ECO57  | 176 | 15/21 | 40 | Periplasm         |
| 146 | Outer membrane protein TolC                                | TOLC_ECOLI  | 206 | 16/24 | 43 | Outer membrane    |
| 147 | Outer membrane protein TolC                                | TOLC_ECOLI  | 99  | 6/6   | 17 | Outer membrane    |
| 150 | Outer membrane protein TolC                                | TOLC_ECOLI  | 155 | 12/18 | 31 | Outer membrane    |
| 156 | Protein YhjJ                                               | YHJJ_ECOLI  | 185 | 13/16 | 34 | Periplasm         |
| 157 | Periplasmic pH-dependent serine endoproteaseDegQ           | DEGQ_ECOLI  | 218 | 16/20 | 46 | Periplasm         |
| 158 | Cell division proteinFtsP                                  | FTSP_ECOLI  | 180 | 15/22 | 33 | Periplasm         |
| 164 | Maltoporin                                                 | LAMB_ECO24  | 119 | 11/17 | 32 | Outer membrane    |
| 165 | Maltoporin                                                 | LAMB_ECOBW  | 144 | 14/26 | 44 | Outer membrane    |
| 166 | Maltoporin                                                 | LAMB_ECOBW  | 168 | 19/37 | 46 | Outer membrane    |
| 167 | Maltoporin                                                 | LAMB_ECOBW  | 181 | 20/40 | 55 | Outer membrane    |
| 168 | Maltoporin                                                 | LAMB_ECOBW  | 203 | 20/37 | 52 | Outer membrane    |
| 169 | Maltoporin                                                 | LAMB_ECO24  | 82  | 6/10  | 23 | Outer membrane    |
| 170 | Rare lipoprotein A                                         | RLPA_ECOLI  | 166 | 13/24 | 33 | Outer membrane    |
| 171 | Rare lipoprotein A                                         | RLPA_ECOLI  | 147 | 11/18 | 22 | Outer membrane    |
| 183 | Chaperone SurA                                             | SURA_ECO57  | 234 | 24/40 | 55 | Periplasm         |
| 192 | Putative acyl-CoA thioester hydrolase YbhC                 | YBHC_ECOLI  | 116 | 11/17 | 27 | Outer membrane    |
| 193 | Elongation factor Tu 1                                     | EFTU1_ECO24 | 107 | 10/26 | 37 | Cytoplasm         |
|     | Putative acyl-CoA thioester hydrolase YbhC                 | YBHC_ECOLI  | 89  | 9/26  | 27 | Outer membrane    |
| 194 | Glucose-1-phosphatase                                      | AGP_ECOLI   | 102 | 9/20  | 22 | Periplasm         |
| 195 | Glucose-1-phosphatase                                      | AGP_ECOLI   | 135 | 13/27 | 30 | Periplasm         |
| 196 | Protein TolB                                               | TOLB_ECO24  | 151 | 9/9   | 23 | Periplasm         |
| 199 | Protein TolB                                               | TOLB_ECO24  | 207 | 17/27 | 46 | Periplasm         |
| 202 | Protein TolB                                               | TOLB_ECO24  | 215 | 17/25 | 49 | Periplasm         |
| 205 | Protein TolB                                               | TOLB_ECO24  | 117 | 7/7   | 18 | Periplasm         |
| 210 | Periplasmic serine endoproteaseDegP                        | DEGP_ECO57  | 125 | 8/9   | 25 | Periplasm         |
| 211 | Periplasmic serine endoproteaseDegP                        | DEGP_ECO57  | 134 | 8/8   | 21 | Periplasm         |
| 225 | Maltose-bindingperiplasmicprotein                          | MALE_ECO57  | 144 | 15/49 | 49 | Periplasm,        |
|     | Glycerophosphoryl diester phosphodiesterase                | GLPQ_ECOLI  | 78  | 11/49 | 38 | Periplasm,        |
|     | Erythronate-4-phosphate dehydrogenase                      | PDXB_ECOBW  | 68  | 9/49  | 32 | Cytoplasm         |
| 226 | Maltose-bindingperiplasmicprotein                          | MALE_ECO57  | 136 | 17/66 | 52 | Periplasm,        |
|     | Glycerophosphoryl diester phosphodiesterase                | GLPQ_ECOLI  | 71  | 12/66 | 38 | Periplasm,        |
| 227 | Maltose-bindingperiplasmicprotein                          | MALE_ECO57  | 112 | 7/8   | 23 | Periplasm         |
| 242 | UncharacterizedproteinYncE                                 | YNCE_ECOLI  | 126 | 8/10  | 31 | Outer membrane    |
| 244 | Outer membrane protein assembly factor BamB                | BAMB_ECOLI  | 222 | 19/30 | 66 | Outer membrane    |
| 245 | Outer membrane protein F                                   | OMPF_ECOLI  | 189 | 13/20 | 56 | Outer membrane    |
| 246 | Outer membrane protein assembly factor BamC                | BAMC_ECOLI  | 110 | 7/9   | 27 | Outer membrane    |
| 247 | Outer membrane protein assembly factor BamC                | BAMC_ECOLI  | 231 | 20/33 | 62 | Outer membrane    |
| 248 | Outer membrane protein assembly factor BamC                | BAMC_ECOLI  | 117 | 7/8   | 27 | Outer membrane    |
| 249 | Iron uptake system component EfeO                          | EFE0_ECO57  | 102 | 6/6   | 16 | Periplasm         |
| 263 | Maltose operon periplasmic protein                         | MALM_ECOLI  | 138 | 10/14 | 25 | C-frag. Periplasm |
| 264 | Glycine betaine/prolinebetaine-binding periplasmic protein | PROX_ECO57  | 101 | 6/7   | 24 | Periplasm         |
| 266 | Lipoprotein NlpI                                           | NLPI_ECO57  | 188 | 10/10 | 38 | Inner membrane *  |
| 267 | Long-chain fatty acid transport protein                    | FADL_ECO57  | 89  | 7/12  | 19 | Outer membrane    |
| 268 | Phospholipase A1                                           | PA1_ECO57   | 106 | 7/11  | 33 | Outer membrane    |
| 273 | Cell division coordinator CpoB                             | CPOB_ECOLI  | 104 | 8/13  | 23 | Periplasm         |
| 272 | Beta-lactamase TEM                                         | BLAT_ECOLX  | 151 | 11/16 | 43 | Periplasm         |
| 274 | Beta-lactamase TEM                                         | BLAT_ECOLX  | 280 | 22/36 | 70 | Periplasm         |

|            |                                                   |            |     |       |            |                  |
|------------|---------------------------------------------------|------------|-----|-------|------------|------------------|
| <b>275</b> | Beta-lactamase TEM                                | BLAT_ECOLX | 148 | 8/8   | 32         | Periplasm        |
| <b>284</b> | Probable L,D-transpeptidase YbiS                  | YBIS_ECO57 | 133 | 8/10  | 46         | Periplasm        |
| <b>286</b> | FKBP-type peptidyl-prolylcis-trans isomerase FkpA | FKBA_ECO57 | 154 | 10/15 | 44         | Periplasm        |
| <b>293</b> | Glutamate/aspartate import solute-binding protein | GLTI_ECOLI | 100 | 6/7   | 21         | Periplasm        |
| <b>301</b> | Lipoprotein NlpE                                  | NLPE_ECOLI | 118 | 8/10  | 42         | Outer membrane   |
| <b>302</b> | Nucleoside-specific channel-forming protein tsx   | TSX_ECO57  | 107 | 6/7   | 26         | Outer membrane   |
| <b>305</b> | Nucleoside-specific channel-forming protein tsx   | TSX_ECO57  | 137 | 11/23 | 42         | Outer membrane   |
| <b>306</b> | MltA-interacting protein                          | MIPA_ECOLI | 112 | 8/13  | 47         | Outer membrane   |
| <b>307</b> | MltA-interacting protein                          | MIPA_ECOLI | 139 | 11/18 | 56         | Outer membrane   |
| <b>312</b> | Metalloprotease LoIP                              | LOIP_ECOLI | 125 | 7/8   | 34         | Outer membrane   |
| <b>308</b> | Outer membrane protein assembly factor BamD       | BAMD_ECO57 | 134 | 7/7   | 29         | Outer membrane   |
| <b>313</b> | Outer membrane protein assembly factor BamD       | BAMD_ECO57 | 264 | 22/34 | 75         | Outer membrane   |
| <b>315</b> | Penicillin-binding protein activator LpoB         | LPOB_ECO57 | 81  | 5/5   | 29         | Outer membrane   |
| <b>318</b> | ABC transporter arginine-binding protein 1        | ARTJ_ECOLI | 103 | 7/9   | 31         | Periplasm        |
| <b>324</b> | Probable phospholipid-binding protein MlaC        | MLAC_ECOLI | 111 | 7/10  | 33         | Periplasm        |
| <b>327</b> | Quorum-sensing regulator protein G                | QSEG_ECO57 | 119 | 7/9   | 24         | Outer membrane   |
| <b>333</b> | Outer-membrane lipoprotein LolB                   | LOLB_ECOL6 | 59  | 3/3   | 18 N-frag. | Outer membrane   |
| <b>341</b> | LPS-assembly lipoprotein LptE                     | LPTE_ECO57 | 88  | 5/6   | 24         | Outer membrane   |
| <b>364</b> | Uncharacterized lipoprotein YajG                  | YAJG_ECOL6 | 140 | 9/12  | 30         | Inner membrane * |
| <b>365</b> | Outer membrane protein slp                        | SLP_ECOLI  | 63  | 3/3   | 26         | Outer membrane   |
| <b>369</b> | Uncharacterized protein YraP                      | YRAP_ECO57 | 193 | 15/24 | 62         | Periplasm        |

a) Accession number in UniProtKB.

**Table S2: Bacterial strains used in this study**

| Strain name                                                | Plasmid presence                 | Reference  |
|------------------------------------------------------------|----------------------------------|------------|
| BL21(DE3) $\Delta ompA$                                    | none                             | [1]        |
| BL21(DE3) $\Delta ompA$ (pET)                              | pET21b                           | [1]        |
| BL21(DE3) $\Delta ompA$ (pET21_Nm-fHbp)                    | pET21_Nm-fHbp                    | This study |
| BL21(DE3) $\Delta ompA$ (pET21_NHBA)                       | pET21_NHBA                       | This study |
| BL21(DE3) $\Delta ompA$ (pET21_Nm-( $\Delta$ Gly)fHbp)     | pET21_Nm-( $\Delta$ Gly)fHbp     | This study |
| BL21(DE3) $\Delta ompA$ (pET21_Nm-(Ala <sub>4</sub> )fHbp) | pET21_Nm-(Ala <sub>4</sub> )fHbp | This study |
| BL21(DE3) $\Delta ompA$ (pET21_Nm-fHbpDomA)                | pET21_Nm-fHbpDomA                | This study |
| BL21(DE3) $\Delta ompA$ (pET21_Nm-fHbpDomAB)               | pET21_Nm-fHbpDomAB               | This study |
| BL21(DE3) $\Delta ompA$ (pET21_Nm-fHbp_C>A)                | pET21_Nm-fHbp_C>A                | This study |
| BL21(DE3) $\Delta ompA$ (pET21_NHBA_C>A)                   | pET21_NHBA_C>A                   | This study |
| BL21(DE3) $\Delta ompA$ (pET21_Ag-fHbp)                    | pET21_Ag-fHbp                    | This study |
| BL21(DE3) $\Delta ompA$ (pET21_Nm-fHbp-vIII)               | pET21_Nm-fHbp-vIII               | This study |
| BL21(DE3) $\Delta ompA$ (pET21_NHBA-vIII)                  | pET21_NHBA-vIII                  | This study |
| BL21(DE3) $\Delta ompA$ (pET21_Nm-fHbpDomA-MUC1)           | pET21_Nm-fHbpDomA-MUC1           | This study |
| BL21(DE3)-C43                                              | None                             | [2, 3]     |
| BL21(DE3)-C43(pET)                                         | pET21b                           | This study |
| BL21(DE3)-C43(pET21_Nm-fHbp)                               | pET21_Nm-fHbp                    | This study |
| BL21(DE3) WT                                               | None                             | [4]        |
| BL21(DE3) WT(pET)                                          | pET21b                           | This study |
| BL21(DE3) WT(pET21_Nm-fHbp)                                | pET21_Nm-fHbp                    | This study |
| BL21(DE3) WT(pET21_NHBA)                                   | pET21_NHBA                       | This study |
| BL21(DE3) $\Delta ompA$ (pACYC_slam1, pET21_Nm-fHbp)       | pACYC_slam1 and pET21_Nm-fHbp    | This study |
| BL21(DE3) WT(pACYC_slam1, pET21_Nm-fHbp)                   | pACYC_slam1 and pET21_Nm-fHbp    | This study |
| BL21(DE3)-C43(pACYC_slam1, pET21_Nm-fHbp)                  | pACYC_slam1 and pET21_Nm-fHbp    | This study |

|                                                  |                               |            |
|--------------------------------------------------|-------------------------------|------------|
| BL21(DE3) $\Delta ompA$ (pACYC pET21_Nm-fHbp)    | pACYC and pET21_Nm-fHbp       | This study |
| BL21(DE3) WT(pACYC, pET21_Nm-fHbp)               | pACYC and pET21_Nm-fHbp       | This study |
| BL21(DE3)-C43(pACYC, pET21_Nm-fHbp)              | pACYC and pET21_Nm-fHbp       | This study |
| BL21(DE3) $\Delta ompA$ (pACYC_slam1 pET21_NHBA) | pACYC_slam1 and pET21_Nm-NHBA | This study |
| BL21(DE3) $\Delta ompA$ (pACYC pET21_NHBA)       | pACYC and pET21_Nm-NHBA       | This study |

**Table S3 - Oligonucleotides used in this study**

| Name             | Sequence                                         |
|------------------|--------------------------------------------------|
| fHbp-F           | GGAGATATACATATGGTGAATCGAACTGCCTTCTGCTGCC         |
| fHbp-R           | GTGATGGTGATGTTATTATTGCTTGGCGGCAAGGC              |
| NHBA-F           | GGAGATATACATATGTTTAAACGCAGCGTAATC                |
| NHBA-R           | GTGATGGTGATGTTATCAATCCTGCTCTTTTTTG               |
| pet-R            | CATATGTATATCTCCTTCTTAAAGTTAAAC                   |
| pET-ΔHIS-F       | TAACATCACCATCACCATCACGATTACAAAGA                 |
| fHbpΔgly-F       | AGCAGCGTCGCCGCCGACATCGGTG                        |
| fHbpΔgly-R       | GGCGACGCTGCTGCAGGCCGGTCAG                        |
| fHbpGly>ALA-F    | GCGGCCGCGGCCGTCGCCGCCGACATCGGTG                  |
| fHbpGly>ALA-R    | GGCCGCGGCCGCGCTGCTGCAGGCCGGTCAG                  |
| fHbpΔdomB/domC-R | GTGATGGTGATGTTACACCTCTCAAGGTTTCAATATGTTTGTT      |
| fHbpΔdomC-R      | GTGATGGTGATGTTATCCGCCGGCATCGTCTG                 |
| NHBA-C>A-R       | GGCAAAAATACAAGCCATTGCGATTACGCTGCG                |
| NHBAC>A-F        | GCTTGTATTTTTGCCCTTTCAGCCgcCGGGGGC                |
| fHbpC>A-R        | TATCAGGGCAGTGGTCAGAGAAAGGCAGCAGAA                |
| fHbpC>A-F        | ACCACTGCCCTGATTCTGACCGCCGCC AGCAGC               |
| pET2-R           | CATATGTATATCTCCTTCTTAAAGTTAAACAAAATTATTC         |
| pETHIS-F         | CATCACCATCACCATCACTAAGATTACAAAGACGATGATGACAAGtga |
| AgfHbp-F         | GAAGGAGATATACAT ATG GTT TAC CCT GTT ATA ACG      |
| AgfHbp-R         | ATGGTGATGGTGATGTTCTTT TTTACCTGCCAA ACC           |
| Nohisflag        | TAACATCACCATCACCATCACGATTACAAAGA                 |
| fHbp-R2          | TTATTGCTTGGCGGCAAGGC                             |
| vIII-R           | GTGATGGTGATGTTATTAGCCGGAATGGTCGGTAACCAC          |
| vIII-F           | CTTGCCGCCAAGCAAGGTTCCCTGGAAGAAAAGAAGGG           |
| NHBA-VIII-F1     | CCGGCAAAAAGAGCAGGAT ggttccctggaagaaaagaaggg      |

|              |                                                |
|--------------|------------------------------------------------|
| NHBA-VIII-R1 | GTGATGGTGATGTTA gccggaatggtcgtaaccac           |
| NHBA-VIII-R  | ATCCTGCTCTTTTTTGCCGG                           |
| NHBA-VIII-F  | TAACATCACCATCACCATCACGATTACAAAGA               |
| R-MUCFH      | GTGATGGTGATGGTGATGTTAATGCGCCGGCGGAGC           |
| F-MUCDomA    | CAAGTATACAAACAAGGGGTGACGAGCGCG                 |
| FHBP-F1      | TAACATCACCATCACCATCACGATTACAAAGA               |
| FHBPDA-R     | TTGTTTGTATACTTGGA ACTCTCCACTCTC                |
| F1-MUC       | GGGGTGACGAGCGCGCCAGATACACGTCCGGCTCCT           |
| R1-MUC       | ATGCGCCGGCGGGGCCGTGAGCCAGGAGCCGGACG            |
| F2-MUC       | CCGCCGGCGCATGGAGTAACGTCAGCACCCAGACACGCGCCCG    |
| R2-MUC       | GTGGGCAGGGGAGCGGTGGATCCCGGTGCCGGGCGCGTGTC      |
| F3-MUC       | CCCCCTGCCACGGTGTACTAGTGCGCCCGATACCCGTCCA       |
| R3-MUC       | ATGCGCCGGCGGCGCGGTGGAGCCCGGTGCTGGACGGGTATC     |
| F4-MUC       | CCGCCGGCGCATGGAGTCACGTCAGCACCCGGACACTCGTCCA    |
| R4-MUC       | GTGTGCTGGAGGCGCGGTTGAACCCGGGGCTGGACGAGTGTC     |
| F5-MUC       | CCTCCAGCACACGGCGTCACCTCAGCTCCAGATACGCGCCCG     |
| R5-MUC       | ATGTGCCGGCGGAGCGGTACTGCCTGGGGCCGGGCGCGTATC     |
| slam-F       | ATAAGGAGATATACC ATGGTTATTTTTATTTTTGTGGGAAGAC   |
| slam-R       | TGATGGCTGCTGCCTTAGAACGTTTTATTA AACTCGACAAACGCC |
| pacyc-F      | TAAGGCAGCAGCCATCACCATCATCACCAC                 |
| pacyc-R      | CATGGTATATCTCCTTATTA AAGTTAAAC                 |
| pacyc-up1    | GGATCTCGACGCTCTCCCT                            |
| pacyc-down1  | GATTATGCGGCCGTGTACAA                           |

1. Fantappie, L., et al., *Antibody-mediated immunity induced by engineered Escherichia coli OMVs carrying heterologous antigens in their lumen*. J Extracell Vesicles, 2014. **3**.
2. Dubnau, D. and R. Losick, *Bistability in bacteria*. Mol Microbiol, 2006. **61**(3): p. 564-72.
3. Wagner, S., et al., *Tuning Escherichia coli for membrane protein overexpression*. Proc Natl Acad Sci U S A, 2008. **105**(38): p. 14371-6.
4. Studier, F.W. and B.A. Moffatt, *Use of bacteriophage T7 RNA polymerase to direct selective high-level expression of cloned genes*. J Mol Biol, 1986. **189**(1): p. 113-30.
